# Supplementary material
Source: PubMed Central journal article supplement (PMC3671261)

Fig 1B

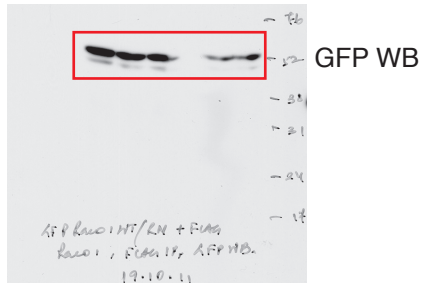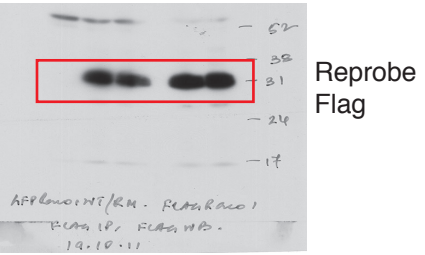

Fig 1E

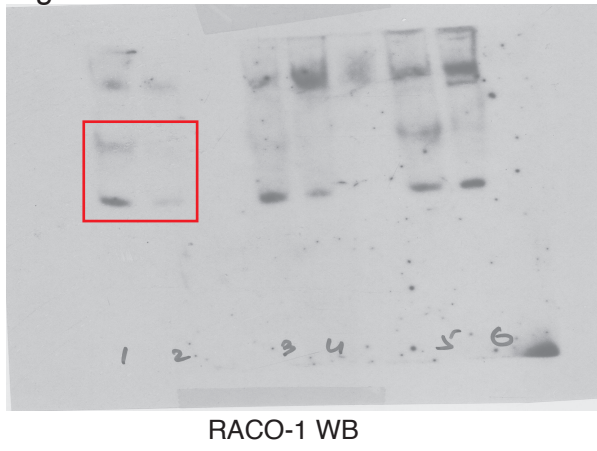

Fig 1C

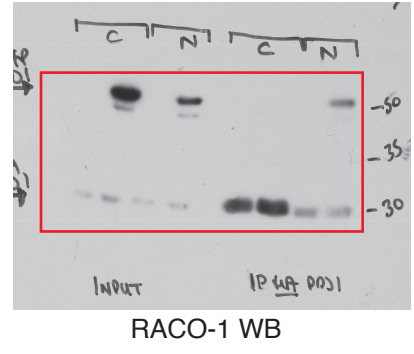

Fig 1D

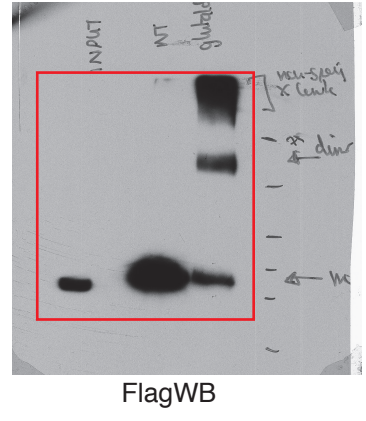

Fig 1F

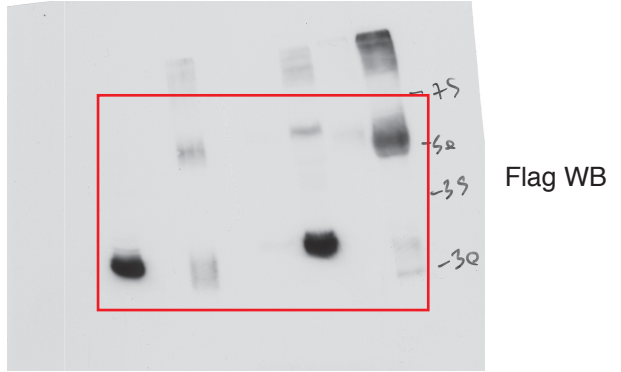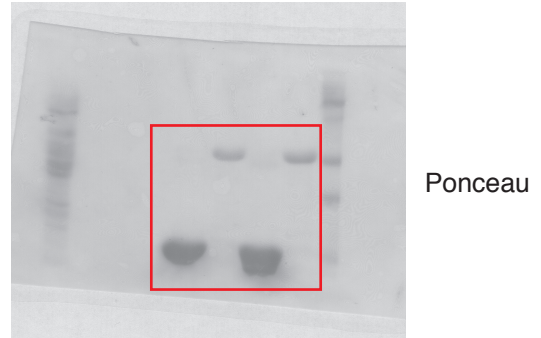

Supplement: emboj201398df1.pdf [file emboj201398df1.pdf]

Fig 5A

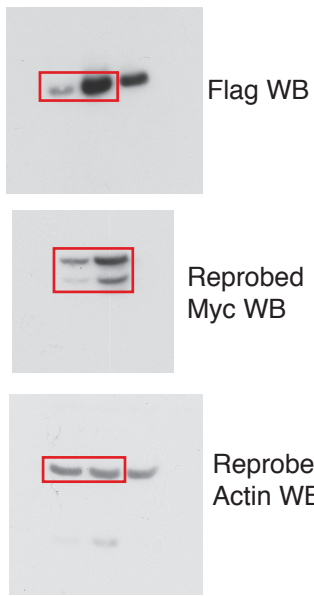

Fig 5B

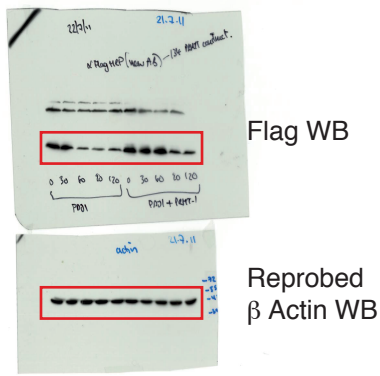

Fig 5C

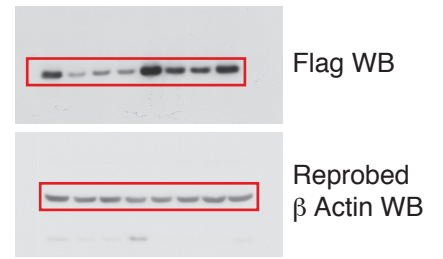

Fig 5D

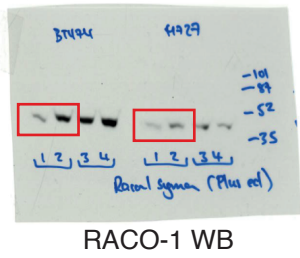

Fig 5E

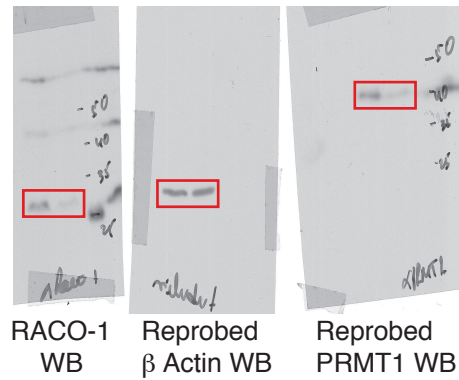

Fig 5F

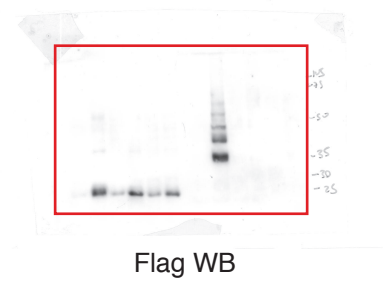

Fig 5G

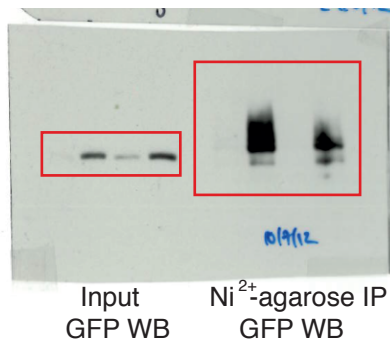

Fig 5H

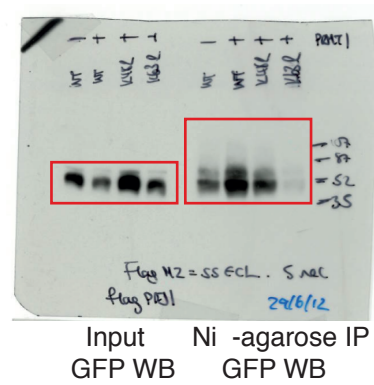

Supplement: emboj201398df5.pdf [file emboj201398df5.pdf]
